# Supplementary material for: Comparative study of melting points of 3,4-bis(3-nitrofurazan-4-yl)furoxan (DNTF)/1,3,3-trinitroazetidine (TNAZ) eutectic compositions using molecular dynamic simulations
Source: Royal Society of Chemistry journal article supplement (doi:10.1039/c6ra12041e), 2016-01-01
Supplement: c6ra12041e1.pdf [file c6ra12041e1.pdf]

## **Supporting Information**

### **Comparative study on melting points of 3,4-bis(3-nitrofurazan-4-yl)furoxan(DNTF)/1,3,3-trinitroazetidine (TNAZ) eutectic compositions with molecular dynamic simulations**

Ning Liu,\* Svatopluk Zeman, Yuan-jie Shu, Zong-kai Wu, Bo-zhou Wang, and Shi-wei Yin

Email: [flackliu@sina.com](mailto:flackliu@sina.com)

Table S1 The calculated specific volume of DNTF and TNAZ at different temperatures<sup>a</sup>

| Compound | Specific volume/cm <sup>3</sup> g <sup>-1</sup> | Temperature/K |
|----------|-------------------------------------------------|---------------|
| DNTF     | 0.5387                                          | 280           |
|          | 0.5410                                          | 300           |
|          | 0.5428                                          | 320           |
|          | 0.5436                                          | 340           |
|          | 0.5447                                          | 360           |
|          | 0.5463                                          | 380           |
|          | 0.5475                                          | 400           |
|          | 0.5536                                          | 420           |
|          | 0.5562                                          | 440           |
|          | 0.5610                                          | 460           |
|          | 0.5655                                          | 480           |
| 0.5677   | 500                                             |               |
| TNAZ     | 0.5883                                          | 260           |
|          | 0.5907                                          | 280           |
|          | 0.5972                                          | 300           |
|          | 0.6002                                          | 320           |
|          | 0.6110                                          | 340           |
|          | 0.6204                                          | 360           |
|          | 0.6277                                          | 380           |
|          | 0.6410                                          | 400           |
|          | 0.6501                                          | 420           |
|          | 0.6690                                          | 440           |
|          | 0.6799                                          | 460           |
| 0.6978   | 480                                             |               |

<sup>a</sup> The data in Table S1 correspond to Fig. 3 and Fig. 4.

Table S2 The calculated specific volume of DNTF/TNAZ eutectic compositions at different temperatures<sup>a</sup>

| Composition | Specific volume/cm <sup>3</sup> g <sup>-1</sup> | Temperature /K | Composition | Specific volume/cm <sup>3</sup> g <sup>-1</sup> | Temperature /K |
|-------------|-------------------------------------------------|----------------|-------------|-------------------------------------------------|----------------|
| mixture 1   | 0.5702                                          | 260            | mixture 2   | 0.5651                                          | 240            |
|             | 0.5768                                          | 280            |             | 0.5681                                          | 260            |
|             | 0.5793                                          | 300            |             | 0.5707                                          | 280            |
|             | 0.5837                                          | 320            |             | 0.5747                                          | 300            |
|             | 0.5909                                          | 340            |             | 0.5790                                          | 320            |
|             | 0.5981                                          | 360            |             | 0.5848                                          | 340            |
|             | 0.6060                                          | 380            |             | 0.5897                                          | 360            |
|             | 0.6175                                          | 400            |             | 0.5966                                          | 380            |
|             | 0.6264                                          | 420            |             | 0.6077                                          | 400            |
|             | 0.6373                                          | 440            |             | 0.6177                                          | 420            |
|             | 0.6492                                          | 460            |             | 0.6235                                          | 440            |
| 0.6597      | 480                                             | 0.6363         | 460         |                                                 |                |
| mixture 3   | 0.5623                                          | 240            | mixture 4   | 0.5583                                          | 240            |
|             | 0.5634                                          | 260            |             | 0.5594                                          | 260            |
|             | 0.5684                                          | 280            |             | 0.5623                                          | 280            |
|             | 0.5707                                          | 300            |             | 0.5652                                          | 300            |
|             | 0.5742                                          | 320            |             | 0.5691                                          | 320            |
|             | 0.5792                                          | 340            |             | 0.5714                                          | 340            |
|             | 0.5848                                          | 360            |             | 0.5747                                          | 360            |
|             | 0.5899                                          | 380            |             | 0.5813                                          | 380            |
|             | 0.5971                                          | 400            |             | 0.5866                                          | 400            |
|             | 0.6039                                          | 420            |             | 0.5914                                          | 420            |
|             | 0.6140                                          | 440            |             | 0.5992                                          | 440            |
| 0.6238      | 460                                             | 0.6058         | 460         |                                                 |                |
| mixture 5   | 0.5512                                          | 260            |             |                                                 |                |
|             | 0.5560                                          | 280            |             |                                                 |                |
|             | 0.5595                                          | 300            |             |                                                 |                |
|             | 0.5624                                          | 320            |             |                                                 |                |
|             | 0.5644                                          | 340            |             |                                                 |                |
|             | 0.5668                                          | 360            |             |                                                 |                |
|             | 0.5720                                          | 380            |             |                                                 |                |
|             | 0.5788                                          | 400            |             |                                                 |                |
|             | 0.5835                                          | 420            |             |                                                 |                |
|             | 0.5903                                          | 440            |             |                                                 |                |
|             | 0.5953                                          | 460            |             |                                                 |                |
| 0.6005      | 480                                             |                |             |                                                 |                |

<sup>a</sup> The data in Table S2 correspond to Fig. 5.

Table S3 The free volume of mixture 3 at different temperatures<sup>a</sup>

| Free volume/Å <sup>3</sup> | Temperature/K |
|----------------------------|---------------|
| 1238.83                    | 240           |
| 1254.80                    | 260           |
| 1289.82                    | 280           |
| 1296.55                    | 300           |
| 1333.47                    | 320           |
| 1376.60                    | 340           |
| 1454.31                    | 360           |
| 1690.18                    | 380           |
| 1916.24                    | 400           |
| 2119.19                    | 420           |
| 2472.13                    | 440           |
| 2679.71                    | 460           |

<sup>a</sup> The data in Table S3 correspond to Fig. 6.

Table S4 The diffusion coefficient of mixture 3 at different temperatures<sup>a</sup>

| Diffusion coefficient/ $\times 10^{-11}$ m <sup>2</sup> s <sup>-1</sup> | Temperature/K |
|-------------------------------------------------------------------------|---------------|
| 0.498                                                                   | 240           |
| 0.622                                                                   | 260           |
| 1.079                                                                   | 280           |
| 1.315                                                                   | 300           |
| 1.545                                                                   | 320           |
| 2.455                                                                   | 340           |
| 3.462                                                                   | 360           |
| 4.547                                                                   | 380           |
| 6.848                                                                   | 400           |
| 8.982                                                                   | 420           |
| 10.514                                                                  | 440           |
| 12.564                                                                  | 460           |

<sup>a</sup> The data in Table S4 correspond to Fig. 8.

Table S5 The specific heat capacity of mixture 3 at different temperatures<sup>a</sup>

| Specific heat capacity/J g <sup>-1</sup> K <sup>-1</sup> | Temperature/K |
|----------------------------------------------------------|---------------|
| 0.912                                                    | 240           |
| 0.985                                                    | 260           |
| 1.013                                                    | 280           |
| 1.060                                                    | 300           |
| 1.137                                                    | 320           |
| 1.194                                                    | 340           |
| 1.228                                                    | 360           |
| 1.252                                                    | 380           |
| 1.309                                                    | 400           |
| 1.331                                                    | 420           |
| 1.350                                                    | 440           |
| 1.396                                                    | 460           |

<sup>a</sup> The data in Table S5 correspond to Fig. 9.

Table S6 The non-bonded energy of mixture 3 at different temperatures<sup>a</sup>

| Non-bonded energy /kcal mol <sup>-1</sup> | Temperature/K |
|-------------------------------------------|---------------|
| -7201.76                                  | 240           |
| -7198.70                                  | 260           |
| -7170.27                                  | 280           |
| -7151.07                                  | 300           |
| -7145.17                                  | 320           |
| -7104.17                                  | 340           |
| -7075.89                                  | 360           |
| -7057.68                                  | 380           |
| -6990.71                                  | 400           |
| -6966.67                                  | 420           |
| -6924.78                                  | 440           |
| -6845.63                                  | 460           |

<sup>a</sup> The data in Table S6 correspond to Fig. 10.

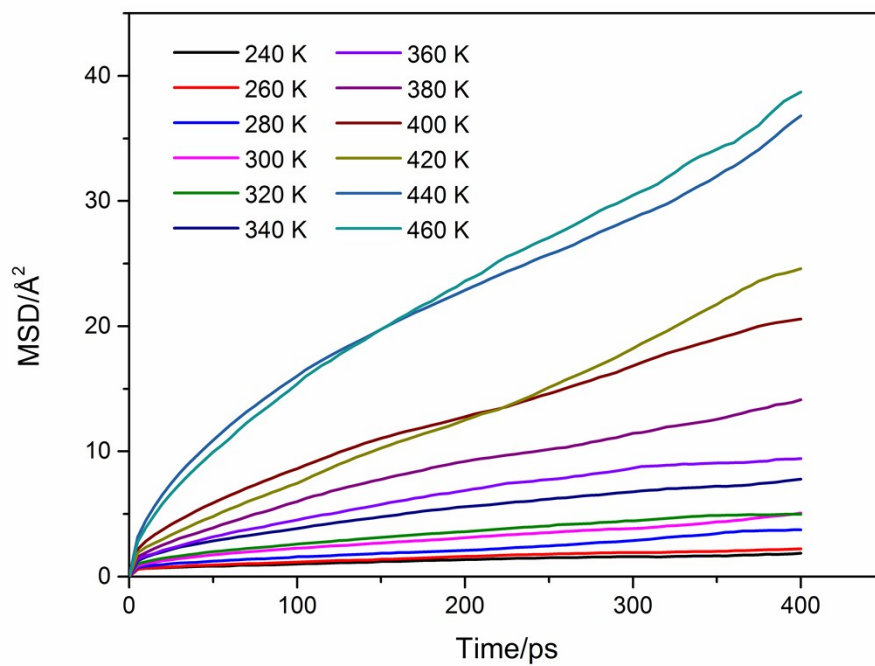

**Fig. S1** The mean square displacement versus time curves for mixture 3 at temperatures from 240 K to 460 K.
